# Supplementary material for: Prognostic Impact of Immunoglobulin Kappa C (IGKC) in Early Breast Cancer
Source: MDPI journal article supplement (doi:10.3390/cancers13143626), 2021-07-20
Supplement: s1 [file s1]

# Supplementary Materials: Prognostic Impact of Immunoglobulin Kappa C (IGKC) in Early Breast Cancer

Marcus Schmidt, Karolina Edlund, Jan G. Hengstler, Anne-Sophie Heimes, Katrin Almstedt, Antje Lebrecht, Slavomir Krajnak, Marco J. Battista, Walburgis Brenner, Annette Hasenburg, Jörg Rahnenführer, Mathias Gehrmann, Pirkko-Liisa Kellokumpu-Lehtinen, Ralph M. Wirtz and Heikki Joensuu

**Table S1.** Cox univariable analysis for DDFS including all patients ( $n = 909$ ). CI, confidence interval; IGKC, immunoglobulin kappa C; HER2, human epidermal growth factor receptor 2; TNBC, triple-negative breast cancer.

| Variable                    | Hazard ratio | 95% CI      | <i>p</i> |
|-----------------------------|--------------|-------------|----------|
| IGKC, continuous            | 0.982        | 0.920–1.048 | 0.589    |
| IGKC                        |              |             |          |
| < median                    | 1.000        |             |          |
| ≥ median                    | 0.948        | 0.685–1.312 | 0.748    |
| IGKC                        |              |             |          |
| < 75 <sup>th</sup> quantile | 1.000        |             |          |
| ≥ 75 <sup>th</sup> quantile | 0.862        | 0.585–1.270 | 0.453    |
| Age                         |              |             |          |
| ≤ 50 years                  | 1.000        |             |          |
| > 50 years                  | 0.829        | 0.599–1.147 | 0.258    |
| ER status                   |              |             |          |
| Negative                    | 1.000        |             |          |
| Positive                    | 0.522        | 0.375–0.728 | <0.001   |
| PR status <sup>1</sup>      |              |             |          |
| Negative                    | 1.000        |             |          |
| Positive                    | 0.667        | 0.482–0.922 | 0.014    |
| HER2 status                 |              |             |          |
| Negative                    | 1.000        |             |          |
| Positive                    | 1.744        | 1.233–2.469 | 0.002    |
| Molecular subtype           |              |             |          |
| Luminal                     | 1.000        |             |          |
| TNBC                        | 2.354        | 1.545–3.587 | <0.001   |
| HER2+                       | 2.143        | 1.476–3.112 | <0.001   |
| Ki67 <sup>2</sup>           |              |             |          |
| ≤ 20%                       | 1.000        |             |          |
| > 20%                       | 1.984        | 1.383–2.847 | <0.001   |
| pT stage <sup>1</sup>       |              |             |          |
| pT1                         | 1.000        |             |          |
| pT2-4                       | 1.748        | 1.230–2.484 | 0.002    |
| pN stage                    |              |             |          |
| pN0                         | 1.000        |             |          |
| pN1-3                       | 2.149        | 1.053–4.382 | 0.035    |
| Grade <sup>3</sup>          |              |             |          |
| Grade I                     | 1.000        |             |          |
| Grade II-III                | 4.331        | 1.911–9.814 | <0.001   |

<sup>1</sup>  $n = 908$ , <sup>2</sup>  $n = 809$ , <sup>3</sup>  $n = 869$

**Table S2.** Cox multivariable analysis for DDFS (all patients). 868 patients had complete data for all variables and were included in the multivariable analysis. *IGKC* expression was dichotomized using the median **(a)** or the top quartile **(b)** as cutoff. The results for *IGKC* expression as a continuous variable are shown in Table 2. CI, confidence interval; *IGKC*, immunoglobulin kappa C; *HER2*, human epidermal growth factor receptor 2; *TNBC*, triple-negative breast cancer.

| <b>(a)</b>        |                     |               |                 |
|-------------------|---------------------|---------------|-----------------|
| <b>Variable</b>   | <b>Hazard Ratio</b> | <b>95% CI</b> | <b><i>p</i></b> |
| <i>IGKC</i>       |                     |               |                 |
| < median          | 1.000               |               |                 |
| ≥ median          | 0.815               | 0.580–1.145   | 0.238           |
| Age               |                     |               |                 |
| ≤ 50 years        | 1.000               |               |                 |
| > 50 years        | 0.899               | 0.643–1.257   | 0.533           |
| Molecular subtype |                     |               |                 |
| Luminal           | 1.000               |               |                 |
| <i>TNBC</i>       | 2.467               | 1.557–3.909   | <0.001          |
| <i>HER2</i> +     | 2.007               | 1.355–2.972   | 0.001           |
| pT stage          |                     |               |                 |
| pT1               | 1.000               |               |                 |
| pT2-4             | 1.622               | 1.123–2.343   | 0.010           |
| pN stage          |                     |               |                 |
| pN0               | 1.000               |               |                 |
| pN1-3             | 4.175               | 1.908–9.135   | <0.001          |
| Grade             |                     |               |                 |
| Grade I           | 1.000               |               |                 |
| Grade II-III      | 2.834               | 1.219–6.592   | 0.016           |

  

| <b>(b)</b>                  |                     |               |                 |
|-----------------------------|---------------------|---------------|-----------------|
| <b>Variable</b>             | <b>Hazard Ratio</b> | <b>95% CI</b> | <b><i>p</i></b> |
| <i>IGKC</i>                 |                     |               |                 |
| < 75 <sup>th</sup> quantile | 1.000               |               |                 |
| ≥ 75 <sup>th</sup> quantile | 0.619               | 0.410–0.934   | 0.022           |
| Age                         |                     |               |                 |
| ≤ 50 years                  | 1.000               |               |                 |
| > 50 years                  | 0.904               | 0.646–1.263   | 0.553           |
| Molecular subtype           |                     |               |                 |
| Luminal                     | 1.000               |               |                 |
| <i>TNBC</i>                 | 2.689               | 1.690–4.279   | <0.001          |
| <i>HER2</i> +               | 2.087               | 1.410–3.090   | <0.001          |
| pT stage                    |                     |               |                 |
| pT1                         | 1.000               |               |                 |
| pT2-4                       | 1.604               | 1.111–2.316   | 0.012           |
| pN stage                    |                     |               |                 |
| pN0                         | 1.000               |               |                 |
| pN1-3                       | 4.322               | 1.974–9.464   | <0.001          |
| Grade                       |                     |               |                 |
| Grade I                     | 1.000               |               |                 |
| Grade II-III                | 2.979               | 1.282–6.924   | 0.011           |

**Table S3.** Cox univariable and multivariable analyses for DDFS in patients with TNBC. Median *IGKC* expression for the patients with TNBC **(a)** or the top quartile **(b)** was used as a cut-off to distinguish between low and high *IGKC*. 132 patients had data for *IGKC* and were included in the univariable analysis. 129 patients had complete data for all variables and were included in the multivariable analysis. CI, confidence interval; *IGKC*, immunoglobulin kappa C; HER2, human epidermal growth factor receptor 2

**(a)**

| Variable                | Univariable Analysis |             |          | Multivariable Analysis |              |          |
|-------------------------|----------------------|-------------|----------|------------------------|--------------|----------|
|                         | Hazard ratio         | 95% CI      | <i>p</i> | Hazard ratio           | 95% CI       | <i>p</i> |
| <i>IGKC</i>             |                      |             |          |                        |              |          |
| < median                | 1.000                |             |          | 1.000                  |              |          |
| ≥ median                | 0.418                | 0.198–0.882 | 0.022    | 0.322                  | 0.146–0.712  | 0.005    |
| Age                     |                      |             |          |                        |              |          |
| ≤ 50 years              | 1.000                |             |          | 1.000                  |              |          |
| > 50 years              | 0.427                | 0.209–0.874 | 0.020    | 0.324                  | 0.150–0.701  | 0.004    |
| pT stage                |                      |             |          |                        |              |          |
| pT1                     | 1.000                |             |          | 1.000                  |              |          |
| pT2-4                   | 0.839                | 0.388–1.813 | 0.654    | 1.469                  | 0.630–3.427  | 0.373    |
| pN stage                |                      |             |          |                        |              |          |
| pN0                     | 1.000                |             |          | 1.000                  |              |          |
| pN1-3                   | 2.796                | 1.076–7.262 | 0.035    | 3.932                  | 1.321–11.705 | 0.014    |
| Grade <sup>1</sup>      |                      |             |          |                        |              |          |
| Grade I-II <sup>2</sup> | 1.000                |             |          | 1.000                  |              |          |
| Grade III               | 0.642                | 0.286–1.442 | 0.283    | 0.735                  | 0.319–1.693  | 0.470    |

<sup>1</sup> *n* = 129; <sup>2</sup> grade was dichotomized as I-II vs III since there was only one TNBC patient with a grade I tumor.

**(b)**

| Variable                | Univariable Analysis |             |          | Multivariable Analysis |              |          |
|-------------------------|----------------------|-------------|----------|------------------------|--------------|----------|
|                         | Hazard ratio         | 95% CI      | <i>p</i> | Hazard ratio           | 95% CI       | <i>p</i> |
| <i>IGKC</i>             |                      |             |          |                        |              |          |
| < 75th quantile         | 1.000                |             |          | 1.000                  |              |          |
| ≥ 75th quantile         | 0.172                | 0.041–0.719 | 0.016    | 0.197                  | 0.045–0.852  | 0.030    |
| Age                     |                      |             |          |                        |              |          |
| ≤ 50 years              | 1.000                |             |          | 1.000                  |              |          |
| > 50 years              | 0.427                | 0.209–0.874 | 0.020    | 0.465                  | 0.216–1.003  | 0.051    |
| pT stage                |                      |             |          |                        |              |          |
| pT1                     | 1.000                |             |          | 1.000                  |              |          |
| pT2-4                   | 0.839                | 0.388–1.813 | 0.654    | 1.193                  | 0.510–2.789  | 0.684    |
| pN stage                |                      |             |          |                        |              |          |
| pN0                     | 1.000                |             |          | 1.000                  |              |          |
| pN1-3                   | 2.796                | 1.076–7.262 | 0.035    | 3.527                  | 1.179–10.550 | 0.024    |
| Grade <sup>1</sup>      |                      |             |          |                        |              |          |
| Grade I-II <sup>2</sup> | 1.000                |             |          | 1.000                  |              |          |
| Grade III               | 0.642                | 0.286–1.442 | 0.283    | 0.782                  | 0.337–1.813  | 0.566    |

<sup>1</sup> *n* = 129; <sup>2</sup> grade was dichotomized as I-II vs III since there was only one TNBC patient with a grade I tumor.

**Table S4:** Cox univariable and multivariable analysis for DDFS in patients with luminal breast cancer. 574 patients had data for *IGKC* and were included in the univariable analysis. 540 patients had complete data for all variables and were included in the multivariable analysis. *IGKC* expression was included as a continuous variable **(a)** or the median **(b)** or top quartile **(c)** of *IGKC* expression in patient with luminal breast cancer was used as a cut-off to distinguish between low and high *IGKC*. CI, confidence interval; *IGKC*, immunoglobulin kappa C; HER2, human epidermal growth factor receptor 2

**(a)**

| Variable              | Univariable Analysis |              |          | Multivariable Analysis |              |          |
|-----------------------|----------------------|--------------|----------|------------------------|--------------|----------|
|                       | Hazard ratio         | 95% CI       | <i>p</i> | Hazard ratio           | 95% CI       | <i>p</i> |
| <i>IGKC</i>           | 0.968                | 0.876–1.070  | 0.524    | 0.960                  | 0.868–1.061  | 0.419    |
| Age                   |                      |              |          |                        |              |          |
| ≤ 50 years            | 1.000                |              |          | 1.000                  |              |          |
| > 50 years            | 0.920                | 0.569–1.490  | 0.735    | 1.135                  | 0.685–1.880  | 0.623    |
| pT stage <sup>1</sup> |                      |              |          |                        |              |          |
| pT1                   | 1.000                |              |          | 1.000                  |              |          |
| pT2-4                 | 2.454                | 1.454–4.142  | 0.001    | 2.228                  | 1.285–3.865  | 0.004    |
| pN stage              |                      |              |          |                        |              |          |
| pN0                   | 1.000                |              |          | 1.000                  |              |          |
| pN1-3                 | 3.171                | 0.440–22.847 | 0.252    | 4.208                  | 0.574–30.832 | 0.157    |
| Grade <sup>2</sup>    |                      |              |          |                        |              |          |
| Grade I               | 1.000                |              |          | 1.000                  |              |          |
| Grade II-III          | 3.793                | 1.521–9.459  | 0.004    | 3.241                  | 1.284–8.183  | 0.013    |

<sup>1</sup> *n* = 573, <sup>2</sup> *n* = 541

**(b)**

| Variable              | Univariable Analysis |              |          | Multivariable Analysis |              |          |
|-----------------------|----------------------|--------------|----------|------------------------|--------------|----------|
|                       | Hazard ratio         | 95% CI       | <i>p</i> | Hazard ratio           | 95% CI       | <i>p</i> |
| <i>IGKC</i>           |                      |              |          |                        |              |          |
| < median              | 1.000                |              |          | 1.000                  |              |          |
| ≥ median              | 1.000                | 0.619–1.614  | 0.999    | 0.970                  | 0.592–1.592  | 0.906    |
| Age                   |                      |              |          |                        |              |          |
| ≤ 50 years            | 1.000                |              |          | 1.000                  |              |          |
| > 50 years            | 0.920                | 0.569–1.490  | 0.735    | 1.137                  | 0.686–1.884  | 0.618    |
| pT stage <sup>1</sup> |                      |              |          |                        |              |          |
| pT1                   | 1.000                |              |          | 1.000                  |              |          |
| pT2-4                 | 2.454                | 1.454–4.142  | 0.001    | 2.246                  | 1.296–3.895  | 0.004    |
| pN stage              |                      |              |          |                        |              |          |
| pN0                   | 1.000                |              |          | 1.000                  |              |          |
| pN1-3                 | 3.171                | 0.440–22.847 | 0.252    | 4.257                  | 0.581–31.182 | 0.154    |
| Grade <sup>2</sup>    |                      |              |          |                        |              |          |
| Grade I               | 1.000                |              |          | 1.000                  |              |          |
| Grade II-III          | 3.793                | 1.521–9.459  | 0.004    | 3.234                  | 1.280–8.169  | 0.013    |

<sup>1</sup> *n* = 573, <sup>2</sup> *n* = 541

---

(c)

| Variable              | Univariable Analysis |              |          | Multivariable Analysis |              |          |
|-----------------------|----------------------|--------------|----------|------------------------|--------------|----------|
|                       | Hazard ratio         | 95% CI       | <i>p</i> | Hazard ratio           | 95% CI       | <i>p</i> |
| IGKC                  |                      |              |          |                        |              |          |
| < 75th quan-<br>tile  | 1.000                |              |          | 1.000                  |              |          |
| ≥ 75th quan-<br>tile  | 0.634                | 0.339–1.184  | 0.153    | 0.578                  | 0.301–1.109  | 0.099    |
| Age                   |                      |              |          |                        |              |          |
| ≤ 50 years            | 1.000                |              |          | 1.000                  |              |          |
| > 50 years            | 0.920                | 0.569–1.490  | 0.735    | 1.138                  | 0.687–1.884  | 0.615    |
| pT stage <sup>1</sup> |                      |              |          |                        |              |          |
| pT1                   | 1.000                |              |          | 1.000                  |              |          |
| pT2-4                 | 2.454                | 1.454–4.142  | 0.001    | 2.249                  | 1.298–3.895  | 0.004    |
| pN stage              |                      |              |          |                        |              |          |
| pN0                   | 1.000                |              |          | 1.000                  |              |          |
| pN1-3                 | 3.171                | 0.440–22.847 | 0.252    | 4.309                  | 0.589–31.538 | 0.150    |
| Grade <sup>2</sup>    |                      |              |          |                        |              |          |
| Grade I               | 1.000                |              |          | 1.000                  |              |          |
| Grade II-III          | 3.793                | 1.521–9.459  | 0.004    | 3.305                  | 1.308–8.349  | 0.011    |

<sup>1</sup> n = 573, <sup>2</sup> n = 541

**Table S5:** Cox univariable and multivariable analysis for DDFS in patients with HER2-positive breast cancer. 203 patients had data for *IGKC* and were included in the univariable analysis. 199 patients had complete data for all variables and were included in the multivariable analysis. *IGKC* expression was included as a continuous variable **(a)** or the median **(b)** or top quartile **(c)** of *IGKC* expression in HER2-positive patients was used as a cut-off to distinguish between low and high *IGKC*. CI, confidence interval; *IGKC*, immunoglobulin kappa C; HER2, human epidermal growth factor receptor 2

**(a)**

| Variable                | Univariable Analysis |              |          | Multivariable Analysis |              |          |
|-------------------------|----------------------|--------------|----------|------------------------|--------------|----------|
|                         | Hazard ratio         | 95% CI       | <i>p</i> | Hazard ratio           | 95% CI       | <i>p</i> |
| <i>IGKC</i>             | 0.944                | 0.837–1.064  | 0.343    | 0.933                  | 0.826–1.055  | 0.271    |
| Age                     |                      |              |          |                        |              |          |
| ≤ 50 years              | 1.000                |              |          | 1.000                  |              |          |
| > 50 years              | 1.159                | 0.650–2.067  | 0.616    | 1.219                  | 0.675–2.201  | 0.512    |
| pT stage                |                      |              |          |                        |              |          |
| pT1                     | 1.000                |              |          | 1.000                  |              |          |
| pT2-4                   | 1.053                | 0.576–1.926  | 0.867    | 1.272                  | 0.688–2.351  | 0.442    |
| pN stage                |                      |              |          |                        |              |          |
| pN0                     | 1.000                |              |          | 1.000                  |              |          |
| pN1-3                   | 4.322                | 1.048–17.820 | 0.043    | 4.863                  | 1.155–20.479 | 0.031    |
| Grade <sup>1</sup>      |                      |              |          |                        |              |          |
| Grade I-II <sup>2</sup> | 1.000                |              |          | 1.000                  |              |          |
| Grade III               | 0.817                | 0.452–1.477  | 0.504    | 0.910                  | 0.501–1.653  | 0.757    |

<sup>1</sup> *n* = 199; <sup>2</sup> grade was dichotomized as I-II vs III since there was only five HER2-positive patients with a grade I tumor.

**(b)**

| Variable                | Univariable Analysis |              |          | Multivariable Analysis |              |          |
|-------------------------|----------------------|--------------|----------|------------------------|--------------|----------|
|                         | Hazard ratio         | 95% CI       | <i>p</i> | Hazard ratio           | 95% CI       | <i>p</i> |
| <i>IGKC</i>             |                      |              |          |                        |              |          |
| < median                | 1.000                |              |          | 1.000                  |              |          |
| ≥ median                | 0.688                | 0.386–1.226  | 0.204    | 0.730                  | 0.406–1.315  | 0.295    |
| Age                     |                      |              |          |                        |              |          |
| ≤ 50 years              | 1.000                |              |          | 1.000                  |              |          |
| > 50 years              | 1.159                | 0.650–2.067  | 0.616    | 1.230                  | 0.680–2.225  | 0.494    |
| pT stage                |                      |              |          |                        |              |          |
| pT1                     | 1.000                |              |          | 1.000                  |              |          |
| pT2-4                   | 1.053                | 0.576–1.926  | 0.867    | 1.269                  | 0.687–2.344  | 0.447    |
| pN stage                |                      |              |          |                        |              |          |
| pN0                     | 1.000                |              |          | 1.000                  |              |          |
| pN1-3                   | 4.322                | 1.048–17.820 | 0.043    | 4.584                  | 1.091–19.258 | 0.038    |
| Grade <sup>1</sup>      |                      |              |          |                        |              |          |
| Grade I-II <sup>2</sup> | 1.000                |              |          | 1.000                  |              |          |
| Grade III               | 0.817                | 0.452–1.477  | 0.504    | 0.930                  | 0.510–1.696  | 0.813    |

<sup>1</sup> *n* = 199; <sup>2</sup> grade was dichotomized as I-II vs III since there was only five HER2-positive patients with a grade I tumor.

**(c)**

| Variable    | Univariable Analysis |        |          | Multivariable Analysis |        |          |
|-------------|----------------------|--------|----------|------------------------|--------|----------|
|             | Hazard ratio         | 95% CI | <i>p</i> | Hazard ratio           | 95% CI | <i>p</i> |
| <i>IGKC</i> |                      |        |          |                        |        |          |

|                         |       |              |       |       |              |       |
|-------------------------|-------|--------------|-------|-------|--------------|-------|
| < 75th quan-<br>tile    | 1.000 |              |       | 1.000 |              |       |
| ≥ 75th quan-<br>tile    | 0.949 | 0.527–1.709  | 0.862 | 0.910 | 0.500–1.656  | 0.757 |
| Age                     |       |              |       |       |              |       |
| ≤ 50 years              | 1.000 |              |       | 1.000 |              |       |
| > 50 years              | 1.159 | 0.650–2.067  | 0.616 | 1.208 | 0.669–2.183  | 0.531 |
| pT stage                |       |              |       |       |              |       |
| pT1                     | 1.000 |              |       | 1.000 |              |       |
| pT2-4                   | 1.053 | 0.576–1.926  | 0.867 | 1.264 | 0.684–2.336  | 0.455 |
| pN stage                |       |              |       |       |              |       |
| pN0                     | 1.000 |              |       | 1.000 |              |       |
| pN1-3                   | 4.322 | 1.048–17.820 | 0.043 | 4.718 | 1.118–19.907 | 0.035 |
| Grade <sup>1</sup>      |       |              |       |       |              |       |
| Grade I-II <sup>2</sup> | 1.000 |              |       | 1.000 |              |       |
| Grade III               | 0.817 | 0.452–1.477  | 0.504 | 0.909 | 0.499–1.655  | 0.754 |

<sup>1</sup>  $n = 199$ ; <sup>2</sup> grade was dichotomized as I-II vs III since there was only five HER2-positive patients with a grade I tumor.
